# Supplementary material
Source: publisher figshare collection journal article supplement (https://sage.figshare.com/ndownloader/files/13430402)
Supplement: Supplementary file 1 [file 13430402]

---

## Appendix

### Items for variables measured

|                             |                |                                                                                        |
|-----------------------------|----------------|----------------------------------------------------------------------------------------|
| Job Satisfaction            |                | J1 I'm very satisfied with my colleagues                                               |
|                             |                | J2 I'm very satisfied with my direct superior                                          |
|                             |                | J3 I'm very satisfied with promotion opportunity                                       |
|                             |                | J4 I'm very satisfied with my remunerations                                            |
|                             |                | J5 I'm very satisfied with hospital environment                                        |
|                             |                | J6 I'm very satisfied with equipment conditions in hospital                            |
| Work-family Conflict        | Time-based     | T1 work keeps me from family activities                                                |
|                             |                | T2 Time I devote to job keeps me from participating in household activities            |
|                             |                | T3 Miss family activities due to work                                                  |
|                             | Behavior-based | B1 Problem-solving behaviors make no sense at home                                     |
|                             |                | B2 Behavior that is effective and necessary at work would be counterproductive at home |
|                             |                | B3 Behaviors make me effective at work do not help me to be a better parent or spouse  |
|                             | Strain-based   | S1 Too frazzled to participate in family activities                                    |
|                             |                | S2 Drain prevents me from contributing to family                                       |
|                             |                | S3 Owing to the pressures from work, I do not want to do favorite things at home       |
| Doctor-patient Relationship |                | D1 Patients show much respect for me                                                   |
|                             |                | D2 The occupation is quite socially respected                                          |
|                             |                | D3 Patients trust me very much                                                         |
|                             |                | D4 The current doctor-patient relationship is very good                                |
